1

2 **Habitat heterogeneity reduces richness of ant species by increasing abundance**  
3 **of the local dominant species**

4

5 B. Travassos-Britto<sup>1\*</sup>, P. B. L. Rocha<sup>2</sup>

6 <sup>1</sup> Department of Environmental Sciences, Federal University of São Paulo, São Paulo City, SP

7 <sup>2</sup> Institute of Biology, Federal University of Bahia, Salvador, BA, Brazil

8 \* Corresponding author

9 Address: Rua do Matão,321 - Travessa 14, Cidade Universitária - São Paulo - SP, Brazil,

10 05508-090

11 e-mail: bruno.travassos@usp.br

12 Received \_\_\_\_\_; revision accepted \_\_\_\_\_.

13 **Abstract** The effect of environmental heterogeneity on species richness is frequently  
14 discussed in ecology. However, the empirical evidence has been contradictory as to the  
15 direction of the effect. Although some authors have considered that this might be a  
16 methodological problem, we argue that for ants, ecological interactions within the  
17 community, as interspecific competition is more important. We analyzed the plausibility of  
18 models in explaining the ant richness distribution patterns in a semi-desert environment. We  
19 used three predicting variables in the construction of the models to explain ant richness  
20 distribution: heterogeneity based on the amount of structures regardless of their type,  
21 heterogeneity based on the diversity of structures, and the abundance of individuals of the  
22 dominant species. We used ANOVA to chose the best model and corroborated the prediction  
23 that in this system abundance of dominant species is the best predictor of ant species  
24 richness. Neither of the heterogeneity conceptions contributed much to explain richness  
25 distribution. However, in a second analysis, we concluded that heterogeneity could affect the  
26 abundance of the dominant species. We conclude that competitive dominance is a better  
27 predictor of species richness distribution patterns than structural heterogeneity. However,  
28 the structural heterogeneity affects the distribution of dominant individuals. We suggest  
29 that some unexplained patterns observed about the relationship between heterogeneity and  
30 richness could be due to an indirect effect.

31 **Key words:** arid environments, caatinga, competition, extreme environments, habitat  
32 heterogeneity, model selection, small scale, structural complexity.

33 **Resumo** O efeito da heterogeneidade ambiental na riqueza de espécies é frequentemente  
34 discutido na ecologia. Entretanto, as evidências empíricas têm sido contraditórias com  
35 relação à direção do efeito. Apesar de alguns autores considerarem que essa divergência é  
36 causada por motivos metodológicos, nós argumentamos que para formigas, interações dentro  
37 da comunidade, como competição interespecífica é mais importante. Nós analisamos a  
38 plausibilidade de diferentes modelos em explicar o padrão de distribuição de riqueza de  
39 morphospecies de formigas em um ambiente semi-desértico (caatinga). Nós usamos três  
40 variáveis preditivas na construção dos modelos para explicar a distribuição de riqueza das  
41 espécies: heterogeneidade baseada na quantidade de estruturas independentemente dos tipos,  
42 heterogeneidade baseado na diversidade de estruturas e abundância de indivíduos da espécie  
43 dominante de formiga. Nós usamos ANOVA para escolher o melhor modelo e corroboramos  
44 a predição que nesse sistema a abundância da espécie dominante é o melhor preditor de  
45 riqueza de espécies de formiga. Nenhuma das concepções de heterogeneidade pareceu  
46 contribuir muito para explicar a distribuição de riquezas de formigas. Entretanto, em uma  
47 segunda análise, concluímos que heterogeneidade tem efeito sobre a abundância da formiga  
48 dominante. Nós concluímos que a dominância competitiva é um melhor preditor do padrão  
49 de distribuição de riqueza das espécies que a heterogeneidade de estruturas. Entretanto, que  
50 heterogeneidade de estruturas influencia a distribuição de indivíduos dominantes. Sugerimos  
51 que alguns padrões não explicados observados sobre a relação entre heterogeneidade e  
52 riqueza pode ser explicado por efeito indireto sobre padrões mais importantes.

53

54 THE DISTRIBUTION PATTERNS OF SPECIES RICHNESS CAN BE INFLUENCED BY EXTERNAL  
55 structures, which affect niche availability in an environment (MacArthur & MacArthur, 1961;  
56 Tews et al, 2004), an important property of the environment. The distribution of species  
57 within a community can also be affected by how interspecific interactions occur among  
58 species (Andersen, 1992; MacArthur & Levins, 1964; Parr, 2008; Savolainen & Vepsäläinen,  
59 1988), a property of the community itself. The concept that changes in a habitat's physical  
60 structure can cause changes in the distribution of species in space is not new in the context  
61 of ecological studies. The extensively explored niche theory states that the distribution of  
62 species is driven by the interaction of individuals with the characteristics of their  
63 environment (Hutchinson, 1959). The effects of the environment on organismal distribution  
64 can be deconstructed into the following two types: the effect of the physical structure of the  
65 environment and the effect of interspecific interactions (Soberón, 2007). There are many  
66 models that explain variation in species distributions based on structural variation and many  
67 others that explore the effect of interspecific interactions. These two types of models lead to  
68 explanations as to why some sites have more species than others that are based on different  
69 mechanisms. Here, we compare the plausibility of models based on both mechanisms to  
70 explain the distribution of ant richness in a semi-desert environment.

71 The habitat heterogeneity hypothesis suggests a mechanism in which structural  
72 variation affects species distribution (Pianka, 1966), and it is a well-discussed theme in  
73 ecology (Heck Jr & Wetstone, 1977; MacArthur, 1964; Pianka, 1966; Simpson, 1964; Tews  
74 et al, 2004). The hypothesis predicts that more heterogeneous habitats will have higher  
75 species richness (MacArthur & MacArthur, 1961). This hypothesis is based on the argument  
76 that heterogeneous habitats have more diverse structural arrangements and therefore can be  
77 exploited in more ways, allowing the coexistence of a greater number of species via a  
78 reduction in competitive pressure. However, this model is not completely supported by

79 empirical data (August, 1983; Cramer & Willig, 2002; Hill et al, 1995; Kotze & Samways,  
80 1999; Lassau & Hochuli, 2004; Lassau et al, 2005; Tews et al, 2004; Wiens, 1974). Because  
81 the mechanism underlying the heterogeneity hypothesis is very intuitive, researchers have  
82 found it difficult to understand cases in which the heterogeneity hypothesis is not supported  
83 by empirical data and to determine what mechanisms are acting in these cases (Tamme et al,  
84 2010; Tews et al, 2004; Travassos-De-Britto & Rocha, 2013).

85 Different authors have suggested that such controversial findings may result from  
86 problems with the methodologies of the studies that have tested the heterogeneity  
87 hypothesis. One of the most notorious methodological problems with testing the  
88 heterogeneity hypothesis is how heterogeneity itself is determined; different measures of  
89 structural heterogeneity may lead to contradictory results concerning its association with  
90 species richness (Heck Jr & Wetstone, 1977; Seibold et al, 2016; Travassos-De-Britto &  
91 Rocha, 2013). Therefore, a proper assessment of the effect of heterogeneity on species  
92 distribution patterns should take this issue into consideration.

93 The two most common concepts of structural heterogeneity proposed in recent studies  
94 are heterogeneity defined either as the amount of sensible structures regardless of their  
95 characteristics (dubbed hereafter as Heterogeneity 1) or as the diversity of structural  
96 elements, taking into consideration how many types of structures there are in the  
97 environment (Heterogeneity 2) (see Tews et al, 2004, for a review). The mechanism  
98 explaining the positive relationship between heterogeneity and richness is slightly different  
99 depending on the type of heterogeneity considered. For Heterogeneity 1, the greater the  
100 amount of structures, the higher the probability of generating more structurally diverse  
101 microhabitats, allowing for different species to make use of these microhabitats. In a more  
102 homogeneous environment (i.e., with less microhabitats), competitive pressure is higher,  
103 leading to fewer species. For Heterogeneity 2, the diversity of structures directly changes the  
104 number of ways it is possible to exploit the environment. A greater diversity of structures  
105 could mean a greater diversity of shelter, food, and nesting places (see Travassos-De-Britto &

106 Rocha, 2013). Because models based on different concepts of heterogeneity might be  
107 explained by different mechanisms, we should treat them as two different predictive variables.

108 Alternatively, the contradictory results concerning tests of the heterogeneity  
109 hypothesis might be due to non-methodological issues. Other variables not associated with  
110 the structure of the environment could be driving species distribution patterns. It is difficult  
111 to determine what could be more important than heterogeneity to species richness in every  
112 system. However, in some systems, there are variables that are especially important.  
113 Studying these systems could be a convenient way of assessing the importance of  
114 heterogeneity in determining species distribution patterns.

115 Competition is an interspecific interaction and has being studied for a long time  
116 (MacArthur & Levins, 1964). Although some studies have shown that competition may not  
117 be as important in shaping communities as previously thought (Connell, 1980; Hubbell,  
118 2001), in some systems, competition continues to be considered of great importance in  
119 understanding species distribution patterns (Cerda et al, 2013; Ligon et al, 2011; Sanders  
120 et al, 2003; Vahl et al, 2005; van Klink et al, 2015). For example, ant assemblages have a  
121 structure based strongly on competition (Cerda et al, 2013; Hölldobler & Wilson, 1990; Parr,  
122 2008). Competition has been shown to shape behavioural and spatial distribution patterns in  
123 ant communities (Vahl et al, 2005; Vepsäläinen et al, 2000). In ant assemblages, there are  
124 species that are markedly more abundant than others (numerically dominant) or that exhibit  
125 a more aggressive foraging behaviour (behaviourally dominant). Arnan et al (2011) observed  
126 that numerically dominant species will often exclude other species by quickly extinguishing  
127 the resources at a site and that behaviourally dominant will exclude other species by directly  
128 attacking ants from other nests (Arnan et al, 2011; Parr, 2008; Segev & Ziv, 2012). In a  
129 specific territory, the non-dominant species are usually referred to as the submissive ant  
130 species. Submissive species will seldom be found foraging at the same sites as dominant  
131 species (Arnan et al, 2011). Searching for resources within the dominant species territory is  
132 energetically risky. Either because they are numerically superior and therefore have a much

133 higher probability of finding and consuming food or because they are more aggressive and  
134 will kill stray foragers from other nests. Therefore, the submissive species exploit the site's  
135 resources by avoiding the dominant species (e.g., by quickly consuming incoming resources  
136 before the dominant species arrives at the site, by foraging at a different time of the day or  
137 by avoiding the chemical trails of dominant individuals) (Hölldobler & Wilson, 1990). This  
138 type of dynamic leads to a model that predicts species distribution patterns based on the  
139 presence of the dominant species Parr (see 2008); Savolainen & Vepsäläinen (see 1988, for  
140 empirical evidence).

141 The importance of competitive dominance in ants may indicate that for this taxon,  
142 the dominant-submissive dynamics in the community might be more important than habitat  
143 heterogeneity. Although there has been evidence of the positive effect of heterogeneity on ant  
144 species richness (e. g. Bestelmeyer & Wiens, 2001; Perfecto & Snelling, 1995), other studies  
145 have also shown no effect or even negative effects (Feller & Mathis, 1997; Lassau & Hochuli,  
146 2004).

147 There are no reasons to think that the mechanism used to explain how heterogeneity  
148 affects species richness does not explain ant richness distribution patterns. Different species  
149 of ants should have a minimum degree of differentiation in resource necessities, and more  
150 heterogeneity should favour coexistence, thereby increasing local species richness. However,  
151 this type of dominance relationship structure occurs frequently in ant assemblages worldwide  
152 (Hölldobler & Wilson, 1990), indicating that this characteristic is strongly linked to the  
153 Formicidae family and that it likely has a strong influence on species distributions within an  
154 ant assemblage. Despite these divergent expectations about the effect of heterogeneity and  
155 presence of dominant on richness distribution, there are no studies that statistically compare  
156 the contribution of these variables in models to explanation ant richness distribution.

157 Here we developed different models explaining distribution of richness by  
158 Heterogeneity 1, Heterogeneity 2, abundance of dominant species or a combination of these  
159 variables. The objective of this study was to determine which model best explains the

160 distribution of ant species in the dunes of northeast semi-desert environment Brazil.

161         The dunes of this semi-desert environment can be considered an extreme environment  
162 for ants. Most of the environment is exposed sand that reaches extremely high temperatures  
163 during day, with sparse patches of vegetation. These characteristics could accentuate the  
164 effect of structural heterogeneity because small changes in structure could produce sharp  
165 changes in microhabitats. However, as a semi-desert environment, it also provides few  
166 resources, which should accentuate competition (Cramer & Willig, 2002). The amount of  
167 structures should be especially important in this extreme environment. For example, a larger  
168 patch of leaf-litter can hold more humidity than a small one. However, a larger patch also  
169 requires more energy to walk through if the heat is not a problem (e. g. for night-time  
170 species). The diversity of structures should also be important because the types of structures  
171 present are very different from one another (e.g., cacti, arboreal and shrub plants, bromeliads,  
172 exposed sand, leaf-litter). Because these are characteristics that should accentuate the effects  
173 of both types of heterogeneity, we are including these two variables in the models building.  
174 However, we expected that the dominance model would better explain the richness of ant  
175 species because competition has been demonstrated to be a very important driver of ant  
176 richness distribution patterns in many communities and environments.

## 177 **METHODS**

178 **STUDY AREA.**— We conducted the study in a sand dune region in northwest Bahia, Brazil.  
179 These dunes are located along the middle of the São Francisco River valley. The climate of  
180 this region is described as arid to semi-arid (Barreto, 1996). High temperatures, with an  
181 annual mean air temperature exceeding 26.2°C and soil temperature exceeding 50°C during  
182 the day, make this place an extreme environment. This region is included in the caatinga  
183 morphoclimatic domain (BAHIA, 1978). The vegetation physiognomy presents trees and  
184 bushes that are short and scattered and lacks conspicuous herbaceous cover, even in the wet



185 season. Therefore, most of the sandy soil remains exposed, except for patches of the  
186 terrestrial bromeliad *Bromelia antiacantha* (Bertol.), the small cactus *Tacinga inamoena* (K.  
187 Schum.) N.P. Taylor and Stuppy, and ground litter. We selected this area because its  
188 structural habitat elements can be easily measured, and the harsh environment of the dunes  
189 should enhance the effects of structural heterogeneity on microhabitat variables.

190

191 ANT SAMPLING—Ant sampling was carried out on three different days of a year. The first  
192 day of sampling was at the peak of the wet season (February), the second was at the peak of  
193 the dry season (September) of the same year, and the third was at the peak of the wet  
194 season of the next year. We distributed 119 pitfall traps on each day of sampling. These  
195 pitfall traps were arranged in a sampling grid with 17 lines and 7 columns placed 10 m apart,  
196 with a total area of 11,200 m<sup>2</sup> per grid. The grids for each day of sampling were plotted at a  
197 distance of least 250 m from where the grids from the previous sampling days were plotted.  
198 Each pitfall trap consisted of three radial 1.5 x 0.4-m plastic drift fences converging on a  
199 20-L dry bucket. Ants were removed from the pitfalls at dawn and at dusk and were  
200 immediately preserved in 70% ethanol and brought to the laboratory for screening and  
201 morphospecies identification. Pik et al (1999) has demonstrated that the identification of  
202 morphospecies closely reflects the species identification of ants.

203 Because ants were collected in a grid spatial autocorrelation could mask the effect of  
204 the variables of interest in our study. We tested for the effect of spatial autocorrelation on  
205 richness among sampling grids using with Moran's I (Diniz-Filho et al, 2003).

206

207 MEASURING VARIABLES—In the study area, the following six easily identifiable types of  
208 structures were used to assess heterogeneity: leaf litter, a terrestrial bromeliad species

209 (*Bromelia antiacantha*), a small cactus species (*Tacinga inamoena*), shrubs, subshrubs and  
210 trees. Each of these types of structures are potentially different structures to ants (Lassau  
211 et al, 2005; Rocha et al, 2010). The bromeliads can accumulate water in ponds in their  
212 centre, which may attract other arthropods. The cacti produce flowers and succulent fruit  
213 but produce very little shade. Sub-shrubs alone do not offer protection from the sun but may  
214 serve as food and shelter from some predators. Shrubs provide areas of higher humidity and  
215 protection from the heat and against terrestrial predators such as lizards or rodents. Trees  
216 can offer more nesting sites and considerably more leaves but seldom provide protection  
217 against visually oriented predators. Leaf-litter may offer protection and increased humidity  
218 but is also more difficult to move across than bare sand (Hughes & Ward, 1993).

219 To measure habitat heterogeneity in each sampling unit, we first drew a 3-m-diameter  
220 circle centred in each pitfall trap. Then, we measured the projected area of each of the six  
221 types of structures in mm<sup>2</sup>. The areas of shrubs and trees were computed by summing the  
222 projected area of each individual plant, considering overlapping of projection. For a graphical  
223 depiction of the structural measurements, see FIGURE 3 in Rocha & Rodrigues (2005).

224 We used two different indexes of heterogeneity: Heterogeneity 1 and Heterogeneity 2.  
225 Heterogeneity 1 was determined by summing the coverage area (mm<sup>2</sup>) of the structures in  
226 each trap unit, and Heterogeneity 2 was determined based on the diversity of structures in  
227 each trap unit, as defined by the Shannon-Weiner diversity index. The spatial scale adopted  
228 was intended to allow for a considerable amount of heterogeneity among the sampling plots  
229 that could be perceived among the populations of ants. The habitat attributes chosen to  
230 reflect heterogeneity were those related to plant growth patterns, which have a close  
231 relationship with ant ecology (Beattie, 1985; Brener & Silva, 1995; Hölldobler & Wilson,  
232 1990; Leal & da Silva, 2003).

233 We used the abundance of the dominant morphospecies as an index of dominant  
234 species presence. We identified the dominant morphospecies based on differences in  
235 abundance and occurrence, i.e., the species that occurred disproportionately more than

236 others (Cerda et al, 2013; Hölldobler & Wilson, 1990; Segev & Ziv, 2012).

237

238 STATISTICAL ANALYSIS We compared models that predicted ant richness distribution based  
239 on combinations of the three variables Heterogeneity 1 (amount of structures), Heterogeneity  
240 2 (diversity of structures) and abundance of the dominant species. Because we think the day  
241 of sampling might be a confusion factor and we wanted to isolated the effect of this variable  
242 we included the day of sampling as the random effect in all models. Because the error  
243 distribution of our dependent variable (morphospecies count) followed a typical distribution  
244 for count data, and because we had a high number of sample units with no ants, we used  
245 Zero Inflated Poisson Generalized Linear Mixed Models (ZIPGLMM) (Zuur et al, 2009).

246 We also analysed whether the abundance of the dominant species was influenced by  
247 heterogeneity. This analysis had the potential to indicate the existence of an indirect effect  
248 of heterogeneity on species richness via an influence on the abundance of the dominant  
249 species. For this analysis, we generated ZIPGLMM with the abundance of dominant species  
250 as the response variable and combinations of Heterogeneity 1 and Heterogeneity 2. The day  
251 of sampling was included as random effect in all models.

252 In both model selections analysis we started with the most complex model and  
253 dropped terms that did not contributed significantly to the explanation of the model. The  
254 models with and without the selected term to be dropped were compared with ANOVA  
255 (significance level = 0.05). At the end of each selection the selected model was compared to  
256 a null model of the poisson distribution.

## 257 RESULTS

258 Ants were captured in 196 of the 351 pitfall traps installed. We captured 999 ants and  
259 identified 18 morphospecies, which seems reasonable in comparison with the most extensive

260 survey of ant species in caatinga phytophysiognomy (see Leal et al, 2003). A total of 653  
261 individuals ( $\sim 65\%$ ) were identified as being from morphospecies 1. In addition, we observed  
262 morphospecies 1 in 148 of the 196 sample units that had ants ( $\sim 70\%$ ). Figure 1 shows a  
263 comparison of the abundance and occurrence between morphospecies 1 and the other  
264 morphospecies. We designated morphospecies 1 as the dominant species because its  
265 abundance and occurrence were both disproportionately higher than those of the other  
266 morphospecies.

267 The Moran's I test showed no effect of the spatial autocorrelation over richness of  
268 species in any sampling grid: Day I (Moran's I = 0.53,  $p$ -value = 0.95) Day II (Moran's I  
269 = 0.11,  $p$ -value = 0.34) Day III (Moran's I = 0.21  $p$ -value = 0.12).

270

271 **SELECTED MODELS**— Among the models comparing the effect of the heterogeneity and  
272 abundance of dominant species on ant richness distribution the model with only abundance  
273 of dominant species as predictor was selected 1. The abundance of dominant species  
274 presented significant effect on both the count of richness of other species and in the presence  
275 and absence of other ants. Poisson count model ( $z$ -value=  $-2.97$ ,  $p$ -value $< 0.003$ ) and  
276 logistic model ( $z$ -value=  $-2.225$ ,  $p$ -value $< 0.026$ ). The fit of this model to the data is  
277 depicted in Figure 2.

278 Among the models comparing the effect of the heterogeneities on the abundance of  
279 dominant species, the model in which the interaction between both measures of  
280 heterogeneity was the predicting variable was selected (Table 2). In the selected model all  
281 variables presented significant effect on the poisson count of richness: Heterogeneity 1  
282 ( $z$ -value=  $-3.10$ ,  $p$ -value $< 0.01$ ), Heterogeneity 2 ( $z$ -value=  $-5.35$ ,  $p$ -value $<< 0.01$ ),  
283 Heterogeneity 1 \* Heterogeneity 2 ( $z$ -value=  $7.32$ ,  $p$ -value $<< 0.01$ ). However, for the  
284 binomial model of presence and absence of dominant species only Heterogeneity 1 some

285 effect: Heterogeneity 1 ( $z$ -value= 3.180,  $p$ -value< 0.001). The fit of the interaction model to  
286 the data is depicted in Figure 3.

## 287 **DISCUSSION**

288 Our results indicate that the variation in richness of ants in the study site, including the  
289 sites with no ants, was explained by the abundance of the dominant species alone (see Table  
290 1). However, heterogeneity might have an indirect effect on a richness distribution. Our  
291 results suggest that the effect of environmental heterogeneity in defining species richness  
292 distribution patterns might not be as important as previously thought when compared with  
293 the effects of interspecific interactions. Here, we discuss some possible mechanisms to explain  
294 the observed patterns.

295 The strong negative relationship between the abundance of the dominant ant species  
296 and the richness of other species (Figure 2) could have two explanations. First, the presence  
297 of the dominant species could have precluded the presence of other species, and the more  
298 conspicuous this presence was, the more the site was avoided by other species. In the second  
299 scenario, the numerically dominant species may have avoided sites where there was a high  
300 number of other species. However, we have reasons to think the first scenario is more  
301 plausible. There is evidence that numerical dominance is associated with behavioural  
302 dominance (Hölldobler & Wilson, 1990) and even that aggressiveness can increase in ants  
303 that can perceive their numerical dominance (Tanner, 2006). However, there is no evidence  
304 that an ant species is capable of detecting the number of different species that forage in a  
305 site and that it might avoid sites where this number is too high. Nevertheless, we think that  
306 the most important aspect of our results is that they might shed light on why heterogeneity  
307 hypotheses are not completely supported by empirical data. We think that the system in  
308 which we executed our study reveals important aspects of this question in relation to scale  
309 and indirect dominance effects.

310 The heterogeneity hypothesis was first proposed and extensively discussed for  
311 large-scale conditions (Blackwell, 2007; MacArthur & Wilson, 1963; Tews et al, 2004). At  
312 larger scales, the effect of heterogeneity is perceived mostly at the population level, and  
313 therefore, processes related to populations can be addressed to understand the partial role of  
314 heterogeneity in determining species distribution patterns. For example, Tamme et al (2010)  
315 suggested that negative relationships between heterogeneity and richness might be due to  
316 fragmentation effects. They argued that as heterogeneity increases on the landscape scale,  
317 fragmentation might also increase; therefore, richness might decrease. The loss of species due  
318 to fragmentation effects is related to a loss of habitat area for a population, which reduces  
319 population size and, in turn, increases the chance of extinction (Fahrig, 2003; Saunders et al,  
320 1991). This mechanism is not reasonable on scales in which heterogeneity is determined by  
321 small structures and not by patches of environments that may shelter entire populations.

322 We think that the patterns observed in our results reveal mechanisms that occur at  
323 small scales and that might explain non-positive relationships between heterogeneity and  
324 species richness. For example, on small scales, it is possible to observe what Andersen (1992)  
325 called “momentary diversity”. This diversity reflects the behaviour of individuals over a  
326 short span of time. Andersen explained that the distribution of species changes on local  
327 scales in response to the presence of dominant species. Because the abundance of the  
328 dominant species changes very quickly, so does the distribution of the species. If the  
329 abundance of the dominant ants varies independently from heterogeneity, a survey on the  
330 system might show no relationship between heterogeneity and species richness.

331 In our study, each trap unit was slightly larger than the conventional foraging range  
332 of a single nest (10 m x 10 m) (Carroll & Janzen, 1973; Gordon, 1995; Harrison & Gentry,  
333 1981). Heterogeneity on this scale could have effects on nesting and foraging behaviour, but  
334 it seems unlikely that an increase in heterogeneity would cause any fragmentation effects.  
335 This indicates that the “momentary diversity” effect might be the process behind the  
336 pattern we observed.

337 The effect of heterogeneity mediated by dominance effects also could reveal new  
338 explanatory mechanisms about negative relationships between richness and heterogeneity. In  
339 the present study, both measures of heterogeneity could either have a positive or negative  
340 effect on abundance of the dominant species distribution depending on the value of the other  
341 measure (see Figure 3) (Fitzmaurice, 2000). However, there is a negative relationship  
342 between Heterogeneity 1 and abundance of dominant species, for mean values of  
343 Heterogeneity 2. And there is a positive relationship between Heterogeneity 2 and richness,  
344 for mean values of Heterogeneity 1. There is support in the literature to both patterns. Ants  
345 have high demand of carbohydrates, protein and heat (Hölldobler & Wilson, 1990).  
346 Environments with high values of Heterogeneity 2 might have variability of resource enough  
347 to provide all necessities of the dominant population. Therefore, foraging in these  
348 environments could be more energy-efficient than foraging in environments with low values  
349 of Heterogeneity 2. On the other hand, it has been suggested that structurally dense sites  
350 (high values of Heterogeneity 1) are not preferable to some ant species because these habitats  
351 might be more energy-consuming to navigate than more homogeneous habitats (see the  
352 size-grain hypothesis of Kaspari & Weiser, 1999).

353 The relationships between heterogeneity and abundance of the dominant species  
354 could reveal some aspects of the relationship between heterogeneity and richness in small  
355 scales. In our study the abundance of the dominant species was negatively associated with  
356 species richness (see Figure 2). The abundance of dominant species was also associated with  
357 structurally dense environments (see Figure 3 top). If the dominant species frequently  
358 forages in less structurally dense environments, a higher number of species in more  
359 structurally dense sites (higher values of Heterogeneity 1) could be explained by the  
360 intermediation of the dominance effect. The submissive species are being “pushed” into more  
361 structurally dense sites by the dominant species. The same logic can be applied to situations  
362 in which the dominant species is positively associated with heterogeneity (see Figure 3  
363 bottom). Dominant species might be pushing submissive species to sites with less diversity

364 of structures. This could explain how species richness is negatively associated with  
365 heterogeneity at smaller scales.

366 Another possibility is that the dominance structure in some systems might be more  
367 complex than we conceive. To generate our dominance model, we considered the simplest  
368 dominance system, which has only dominant and submissive ants. Dominance relationships  
369 in ants can have other elements, including sub-dominant ants. Arnan et al (2011) showed  
370 that in some cases, the effect of the presence of a dominant species on the richness of other  
371 species is positive. They argued that a high abundance of a dominant species precludes the  
372 occurrence of sub-dominant species, which allows for much more submissive species to occur.  
373 In these cases, if the dominant ants forage in the more homogeneous environment, we might  
374 expect to find a negative relationship between heterogeneity and ant species richness.

375 Dominance is a very important characteristic in determining ant species distribution  
376 patterns (Hölldobler & Wilson, 1990). In other taxa for which dominance relationships are  
377 not so important, the pattern we observed might not be so clear. In our study, the strong  
378 effect of dominance when compared with that of heterogeneity may not be a particularity of  
379 the dominance structure of the taxon studied but instead a particularity of the environment  
380 where the study was carried out. In the semi-desert environment of these dunes, resources  
381 are very limited, which should intensify the effects of competition in ants (Brown et al,  
382 1979), including those concerning dominant aggressive species (Gordon, 1991). However, in  
383 relatively homogeneous environments, such as sand dunes, small changes in the structural  
384 configuration of the environment can cause large changes in microhabitat variables  
385 (Blackwell, 2007; Rosenzweig & Winakur, 1969), which could also lead to strong effects of  
386 habitat heterogeneity. This supports the idea that the dominance effect was strong in the  
387 current study because of the taxonomic group and not because of the environmental  
388 characteristics.

389 Other result worth noting is the interaction among heterogeneity measures. Although  
390 this interaction did not affect richness distribution (Table 1), it affected abundance of



391 dominant species (Table 2). It is interesting that the model in which the heterogeneity  
392 measures did not interact was not significantly different from the null model. This results  
393 suggests that the effect of the amount of structures on the population is conditioned by the  
394 diversity of structures, and vice-versa (Fitzmaurice, 2000). This is another indicative that  
395 the method one measure heterogeneity can drastically affect the results of the study (Tews  
396 et al, 2004; Travassos-De-Britto & Rocha, 2013). Even though these two features of the  
397 habitat interact they have different mechanisms affecting biodiversity. We suggest that  
398 amount of structures and diversity be considered separated components of what we may call  
399 heterogeneity. As different components they affect biodiversity by different mechanisms.  
400 Authors dealing with the habitat heterogeneity hypothesis should take this in consideration.

401 We conclude that the structure of interspecific relationships might be more important  
402 than variables related to structural heterogeneity in determining species distribution  
403 patterns. In some situations, interspecific interactions might even be the most important  
404 factors, completely masking the effects of heterogeneity. We emphasize that these types of  
405 relationships must be taken into consideration when trying to understand the effects of  
406 environmental conditions on species distribution. Furthermore, we suggest that future  
407 studies incorporate the hypothesis of the effects of heterogeneity mediated by the effects of  
408 dominance as elaborated in this discussion.

## 409 **ACKNOWLEDGEMENTS**

410 We thank the Laboratório de Vertebrados Terrestres research group for their help during our  
411 fieldwork. We are indebted to the Laboratório de Ecologia Teórica research group for their  
412 logistical and intellectual support in the production of the manuscript. B.  
413 Travassos-de-Britto and P. L. B. Rocha were supported by scholarships from the Conselho  
414 Nacional de Desenvolvimento Científico e Tecnológico (CNPq) and Coordenação de  
415 Aperfeiçoamento de Pessoal de Nível Superior (CAPES) during this project. The

416 Pró-Reitoria de Pós-Graduação UFBA (PROPG-UFBA) provided financial support for the  
417 costs of the English revision service.

#### 418 LITERATURE CITED

- 419 ANDERSEN, A. N. 1992. Regulation of "momentary" diversity by dominant species in  
420 exceptionally rich ant communities of the Australian seasonal tropics. *American*  
421 *Naturalist* 401–420.
- 422 ARNAN, X., GAUCHEREL, C. & ANDERSEN, A. N. 2011. Dominance and species  
423 co-occurrence in highly diverse ant communities: a test of the interstitial hypothesis  
424 and discovery of a three-tiered competition cascade. *Oecologia* 166: 783–794.
- 425 AUGUST, P. V. 1983. The role of habitat complexity and heterogeneity in structuring  
426 tropical mammal communities. *Ecology* 1495–1507.
- 427 BAHIA, S. 1978. Atlas do estado da Bahia; II etapa. Salvador: SEPLANTEC .
- 428 BARRETO, A. M. F. 1996. Interpretação paleoambiental do sistema de dunas fixadas do  
429 médio Rio São Francisco, Bahia. Ph.D. thesis, Universidade de São Paulo.
- 430 BEATTIE, A. J. 1985. The evolutionary ecology of ant-plant mutualisms. Cambridge  
431 University Press.
- 432 BESTELMEYER, B. T. & WIENS, J. A. 2001. Local and regional-scale responses of ant  
433 diversity to a semiarid biome transition. *Ecography* 24: 381–392.
- 434 BLACKWELL, P. G. 2007. Heterogeneity, patchiness and correlation of resources. *ecological*  
435 *modelling* 207: 349–355.
- 436 BRENER, A. G. F. & SILVA, J. F. 1995. Leaf-cutting ant nests and soil fertility in a  
437 well-drained savanna in western Venezuela. *Biotropica* 250–254.

- 438 BROWN, J. H., DAVIDSON, D. W. & REICHMAN, O. J. 1979. An experimental study of  
439 competition between seed-eating desert rodents and ants. *American Zoologist*  
440 1129–1143.
- 441 CARROLL, C. & JANZEN, D. H. 1973. Ecology of foraging by ants. *Annual Review of*  
442 *Ecology and systematics* 231–257.
- 443 CERDA, X., ARNAN, X. & RETANA, J. 2013. Is competition a significant hallmark of ant  
444 (Hymenoptera: Formicidae) ecology. *Myrmecological News* 18: 131–147.
- 445 CONNELL, J. H. 1980. Diversity and the coevolution of competitors, or the ghost of  
446 competition past. *Oikos* 131–138.
- 447 CRAMER, M. J. & WILLIG, M. R. 2002. Habitat heterogeneity, habitat associations, and  
448 rodent species diversity in a sand–shinnery-oak landscape. *Journal of Mammalogy* 83:  
449 743–753.
- 450 DINIZ-FILHO, J. A. F., BINI, L. M. & HAWKINS, B. A. 2003. Spatial autocorrelation and  
451 red herrings in geographical ecology. *Global ecology and Biogeography* 12: 53–64.
- 452 FAHRIG, L. 2003. Effects of habitat fragmentation on biodiversity. *Annual review of ecology,*  
453 *evolution, and systematics* 487–515.
- 454 FELLER, I. C. & MATHIS, W. N. 1997. Primary herbivory by wood-boring insects along  
455 an architectural gradient of rhizophora mangle. *Biotropica* 29: 440–451.
- 456 FITZMAURICE, G. 2000. The meaning and interpretation of interaction. *Nutrition* 16:  
457 313–314.
- 458 GORDON, D. M. 1991. Behavioral flexibility and the foraging ecology of seed-eating ants.  
459 *American Naturalist* 379–411.

- 460 GORDON, D. M. 1995. The development of an ant colony's foraging range. *Animal*  
461 *Behaviour* 49: 649–659.
- 462 HARRISON, J. S. & GENTRY, J. B. 1981. Foraging pattern, colony distribution, and  
463 foraging range of the florida harvester ant, *pogonomyrmex badius*. *Ecology*  
464 1467–1473.
- 465 HECK JR, K. L. & WETSTONE, G. S. 1977. Habitat complexity and invertebrate species  
466 richness and abundance in tropical seagrass meadows. *Journal of Biogeography*  
467 135–142.
- 468 HILL, J. K., HAMER, K. C., LACE, L. A. & BANHAM, W. M. T. 1995. Effects of  
469 selective logging on tropical forest butterflies on Buru, Indonesia. *Journal of Applied*  
470 *Ecology* 754–760.
- 471 HÖLLDOBLER, B. & WILSON, E. O. 1990. *The ants*. Harvard University Press.
- 472 HUBBELL, S. P. 2001. *The unified neutral theory of biodiversity and biogeography*  
473 (MPB-32), vol. 32. Princeton University Press.
- 474 HUGHES, J. J. & WARD, D. 1993. Predation risk and distance to cover affect foraging  
475 behaviour in namib desert gerbils. *Animal Behaviour* 46: 1243–1245.
- 476 HUTCHINSON, G. E. 1959. Why are there so many kinds of animals. *The American*  
477 *Naturalist* 93: 145–159.
- 478 KASPARI, M. & WEISER, M. D. 1999. The size–grain hypothesis and interspecific scaling  
479 in ants. *Functional Ecology* 13: 530–538.
- 480 KOTZE, D. J. & SAMWAYS, M. J. 1999. Invertebrate conservation at the interface between  
481 the grassland matrix and natural Afromontane forest fragments. *Biodiversity &*  
482 *Conservation* 8: 1339–1363.

- 483 LASSAU, S. A. & HOCHULI, D. F. 2004. Effects of habitat complexity on ant assemblages.  
484 *Ecography* 27: 157–164.
- 485 LASSAU, S. A., HOCHULI, D. F., CASSIS, G. & REID, C. A. 2005. Effects of habitat  
486 complexity on forest beetle diversity: do functional groups respond consistently?  
487 *Diversity and distributions* 11: 73–82.
- 488 LEAL, I. R. & DA SILVA, J. M. C. 2003. *Ecologia e conservação da Caatinga*. Editora  
489 Universitária UFPE.
- 490 LEAL, I. R., LEAL, I., TABARELLI, M. & SILVA, J. 2003. Diversidade de formigas em  
491 diferentes unidades de paisagem da caatinga. *Ecologia e conservação da caatinga* 1:  
492 435–461.
- 493 LIGON, R. A., SIEFFERMAN, L. & HILL, G. E. 2011. Invasive fire ants reduce  
494 reproductive success and alter the reproductive strategies of a native vertebrate  
495 insectivore. *PloS one* 6: e22578.
- 496 MACARTHUR, R. H. 1964. Environmental factors affecting bird species diversity. *The*  
497 *American Naturalist* 98: 387–397.
- 498 MACARTHUR, R. H. & LEVINS, R. 1964. Competition, habitat selection, and character  
499 displacement in a patchy environment. *Proceedings of the National Academy of*  
500 *Sciences* 51: 1207–1210.
- 501 MACARTHUR, R. H. & MACARTHUR, J. W. 1961. On bird species diversity. *Ecology* 42:  
502 594–598.
- 503 MACARTHUR, R. H. & WILSON, E. O. 1963. An equilibrium theory of insular  
504 zoogeography. *Evolution* 373–387.
- 505 PARR, C. L. 2008. Dominant ants can control assemblage species richness in a South  
506 African savanna. *Journal of Animal Ecology* 77: 1191–1198.

- 507 PERFECTO, I. & SNELLING, R. 1995. Biodiversity and the transformation of a tropical  
508 agroecosystem: ants in coffee plantations. *Ecological applications* 1084–1097.
- 509 PIANKA, E. R. 1966. Latitudinal gradients in species diversity: a review of concepts.  
510 *American Naturalist* 33–46.
- 511 PIK, A. J., OLIVER, I. & BEATTIE, A. J. 1999. Taxonomic sufficiency in ecological  
512 studies of terrestrial invertebrates. *Australian Journal of Ecology* 24: 555–562.
- 513 ROCHA, P. L. & RODRIGUES, M. T. 2005. Electivities and resource use by an assemblage  
514 of lizards endemic to the dunes of the São Francisco River, northeastern Brazil.  
515 *Papéis Avulsos de Zoologia (São Paulo)* 45: 261–284.
- 516 ROCHA, P. L. B., SÁ, T. S., DAMASCENO, R. P. & XAVIER, E. 2010. Do litter  
517 arthropods respond to microhabitat gradients? A case study from Brazilian sand  
518 dunes in semiarid Caatinga. *Revista Brasileira de Zoociências* 12: 257–271.
- 519 ROSENZWEIG, M. L. & WINAKUR, J. 1969. Population ecology of desert rodent  
520 communities: habitats and environmental complexity. *Ecology* 558–572.
- 521 SANDERS, N. J., GOTELLI, N. J., HELLER, N. E. & GORDON, D. M. 2003. Community  
522 disassembly by an invasive species. *Proceedings of the National Academy of Sciences*  
523 100: 2474–2477.
- 524 SAUNDERS, D. A., HOBBS, R. J. & MARGULES, C. R. 1991. Biological consequences of  
525 ecosystem fragmentation: a review. *Conservation biology* 5: 18–32.
- 526 SAVOLAINEN, R. & VEPSÄLÄINEN, K. 1988. A competition hierarchy among boreal ants:  
527 impact on resource partitioning and community structure. *Oikos* 135–155.
- 528 SEGEV, U. & ZIV, Y. 2012. Consequences of behavioral vs. numerical dominance on  
529 foraging activity of desert seed-eating ants. *Behavioral ecology and sociobiology* 66:  
530 623–632.

- 531 SEIBOLD, S., BÄSSLER, C., BRANDL, R., BÜCHE, B., SZALLIES, A., THORN, S.,  
532 ULYSHEN, M. D. & MÜLLER, J. 2016. Microclimate and habitat heterogeneity as  
533 the major drivers of beetle diversity in dead wood. *Journal of Applied Ecology* .
- 534 SIMPSON, G. G. 1964. Species density of North American recent mammals. *Systematic*  
535 *Zoology* 13: 57–73.
- 536 SOBERÓN, J. 2007. Grinnellian and eltonian niches and geographic distributions of species.  
537 *Ecology letters* 10: 1115–1123.
- 538 TAMME, R., HIIESALU, I., LAANISTO, L., SZAVA-KOVATS, R. & PÄRTEL, M. 2010.  
539 Environmental heterogeneity, species diversity and co-existence at different spatial  
540 scales. *Journal of Vegetation Science* 21: 796–801.
- 541 TANNER, C. J. 2006. Numerical assessment affects aggression and competitive ability: a  
542 team-fighting strategy for the ant *formica xerophila*. *Proceedings of the Royal Society*  
543 *of London B: Biological Sciences* 273: 2737–2742.
- 544 TEWS, J., BROSE, U., GRIMM, V., TIELBÖRGER, K., WICHMANN, M. C., SCHWAGER,  
545 M. & JELTSCH, F. 2004. Animal species diversity driven by habitat  
546 heterogeneity/diversity: the importance of keystone structures. *Journal of*  
547 *biogeography* 31: 79–92.
- 548 TRAVASSOS-DE-BRITTO, B. & ROCHA, P. L. B. D. 2013. Habitat amount, habitat  
549 heterogeneity, and their effects on arthropod species diversity. *Ecoscience* 20:  
550 207–214.
- 551 VAHL, W. K., LOK, T., VAN DER MEER, J., PIERSMA, T. & WEISSING, F. J. 2005.  
552 Spatial clumping of food and social dominance affect interference competition among  
553 ruddy turnstones. *Behavioral Ecology* 16: 834–844.

- 554 VAN KLINK, R., VAN DER PLAS, F., VAN NOORDWIJK, C., WALLISDEVRIES, M. F. &  
555 OLF, H. 2015. Effects of large herbivores on grassland arthropod diversity.  
556 *Biological reviews* 90: 347–366.
- 557 VEPSÄLÄINEN, K., SAVOLAINEN, R., TIAINEN, J. & VILÉN, J. 2000. Successional changes  
558 of ant assemblages: from virgin and ditched bogs to forests. In *Annales Zoologici*  
559 *Fennici*, 135–149. JSTOR.
- 560 WIENS, J. A. 1974. Habitat heterogeneity and avian community structure in North  
561 American grasslands. *American Midland Naturalist* 195–213.
- 562 ZUUR, A., IENO, E., WALKER, N., SAVELIEV, A. & SMITH, G. 2009. Mixed effects  
563 models and extensions in ecology with r. gail m, krickeberg k, samet jm, tsiatis a,  
564 wong w, editors. New York, NY: Springer Science and Business Media .



565 TABLES

**Table 1.** Models explaining ant richness distribution by two heterogeneity measures and dominance relationship. The models are presented in complexity order from top to bottom. The terms dropped were those with the higher p-value within each model (Zuur et al, 2009). The values in the third, fourth and fifth columns are the comparison between the model in the line and the model immediately below. The selected model is highlighted in bold.

| Models                                | <i>LogLik</i>  | <i>df</i> | <i>Deviance</i> | <i>p – value</i> |
|---------------------------------------|----------------|-----------|-----------------|------------------|
| Het 1 * Het 2 * Dominance             | -362.75        | 2         | 1.818           | 0.40             |
| Het 1 * Dominance + Het 2 * Dominance | -363.66        | 1         | 0.052           | 0.82             |
| Het 1 + Het 2 * Dominance             | -363.69        | 1         | 0.166           | 0.68             |
| Het1 + Het 2 + Dominance              | -363.77        | 1         | 0.114           | 0.74             |
| Het1 + Dominance                      | -363.82        | 1         | 1.218           | 0.27             |
| <b>Dominance</b>                      | <b>-364.43</b> | <b>1</b>  | <b>10.376</b>   | < 0.01           |
| Null model                            | -369.62        |           |                 |                  |

**Table 2.** Models explaining dominant ant abundance by two different heterogeneity measures. In the first line there is the comparison between the model with interaction between heterogeneity measures and the model without interaction. The second line shows the comparison between the interaction model and a null model. The interaction model was selected.

| Models              | <i>LogLik</i>  | <i>df</i> | <i>Deviance</i> | <i>p – value</i> |
|---------------------|----------------|-----------|-----------------|------------------|
| <b>Het1 * Het 2</b> | <b>-596.60</b> | <b>1</b>  | <b>40.256</b>   | << 0.01          |
|                     |                | <b>3</b>  | <b>42.724</b>   | << 0.01          |
| Het 1 + Het 2       | -616.73        |           |                 |                  |
| Null Model          | -617.96        |           |                 |                  |

566 **FIGURES**

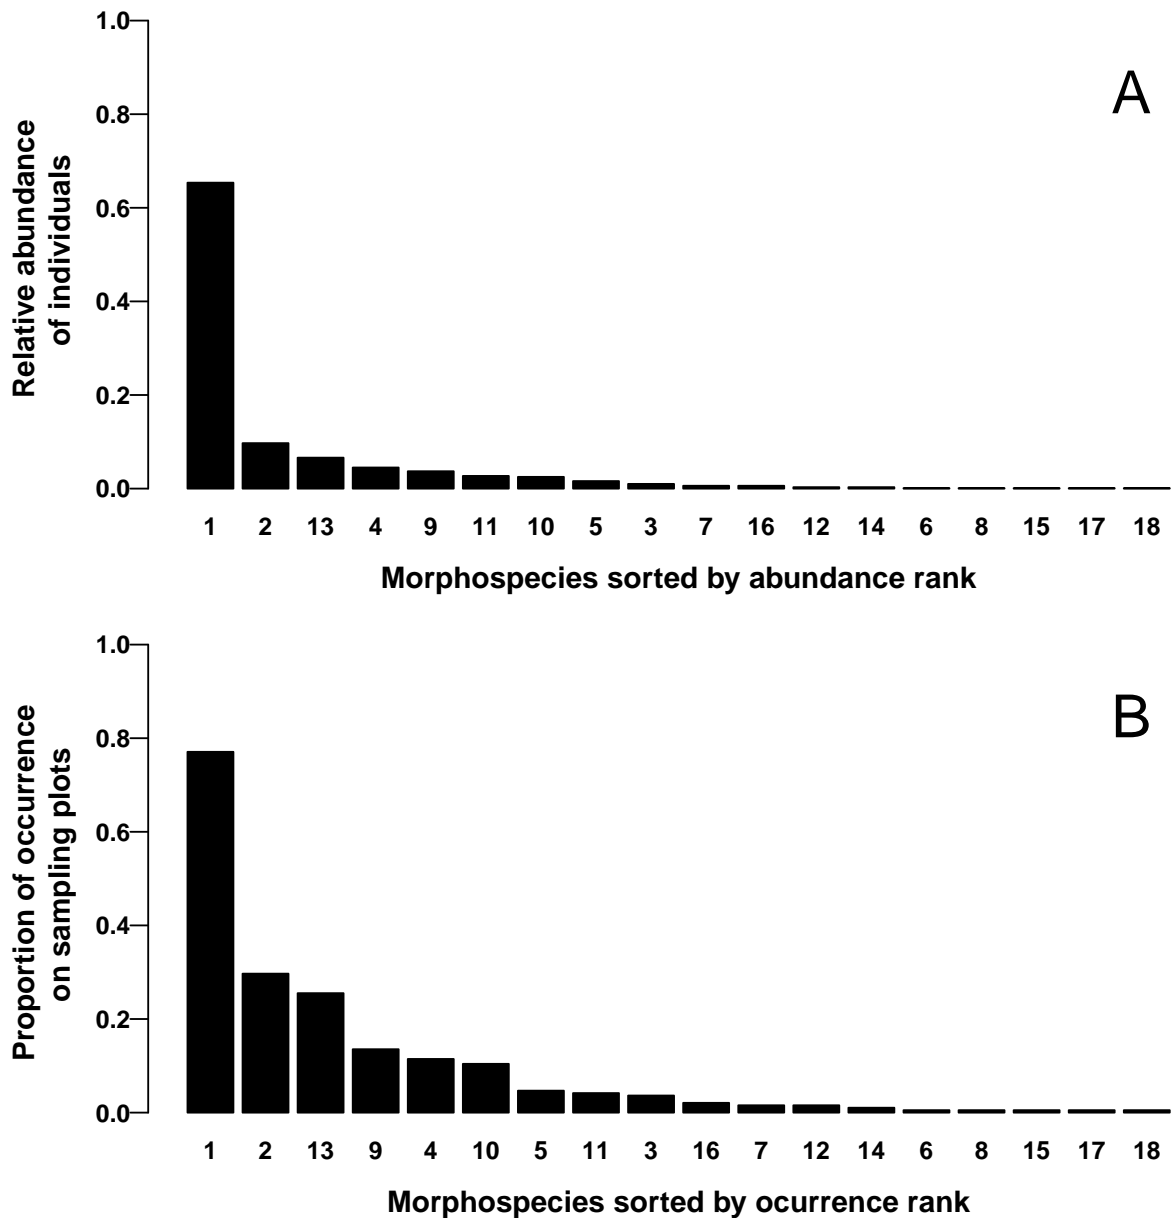

**Figure 1.** Relative abundance of individuals of each morphospecies in a total of 999 individuals (A) and the proportion of each morphospecies in the 196 pitfall traps considered (B). The numbers on the x axis indicate the identity of the morphospecies.

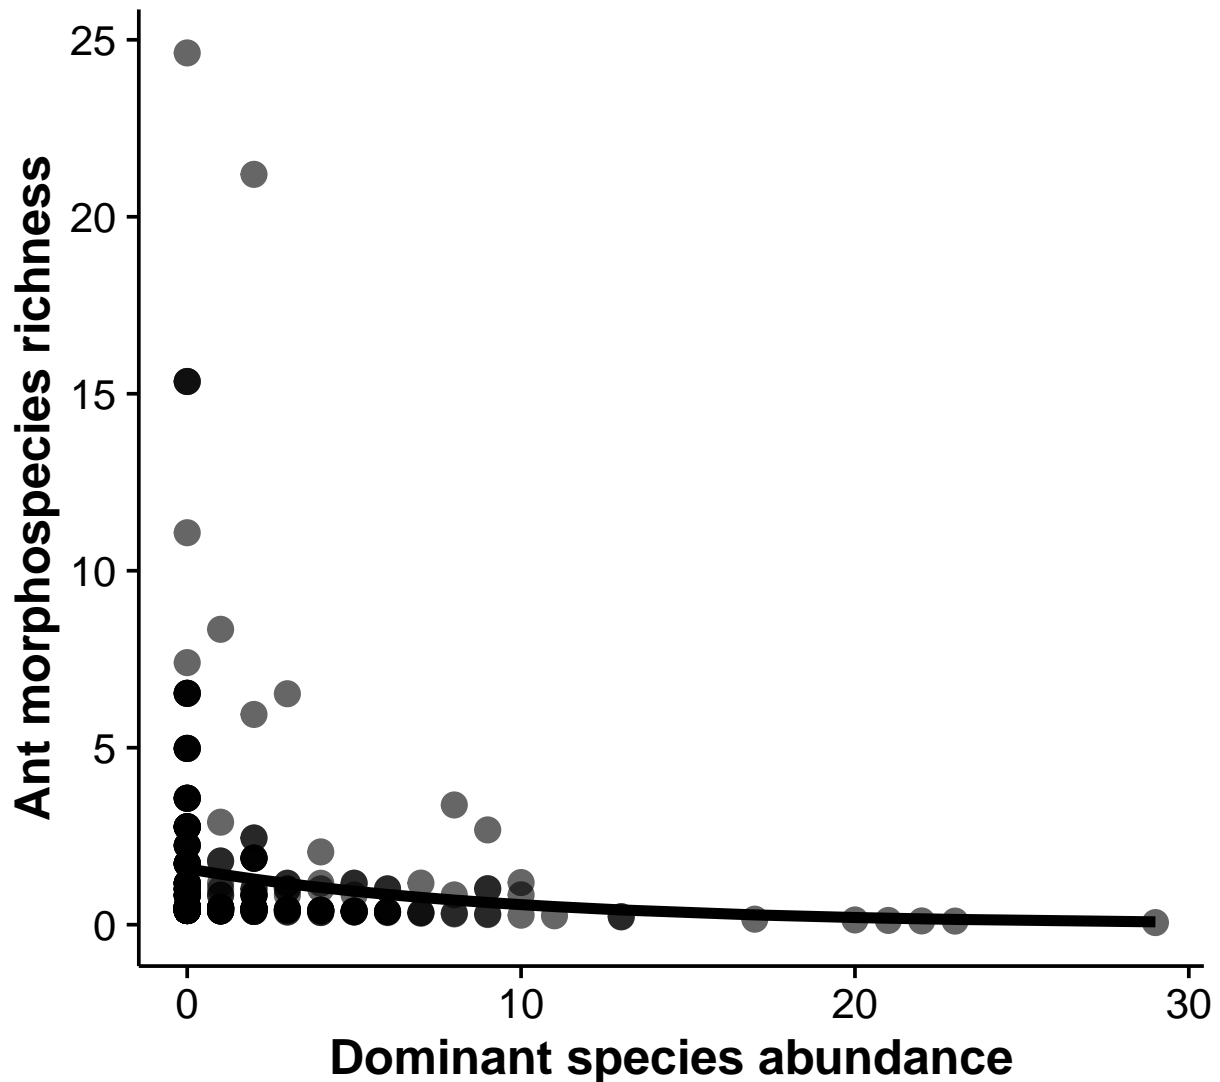

**Figure 2.** Poisson model fit to the richness of species data in relation to the abundance of dominant morphospecies. Because we wanted to present the relationship of these two variables when the effect of the day of sampling is removed, and because the link function of a poisson distribution is logarithm we used the exponential residuals of the model in the 'y' axis.

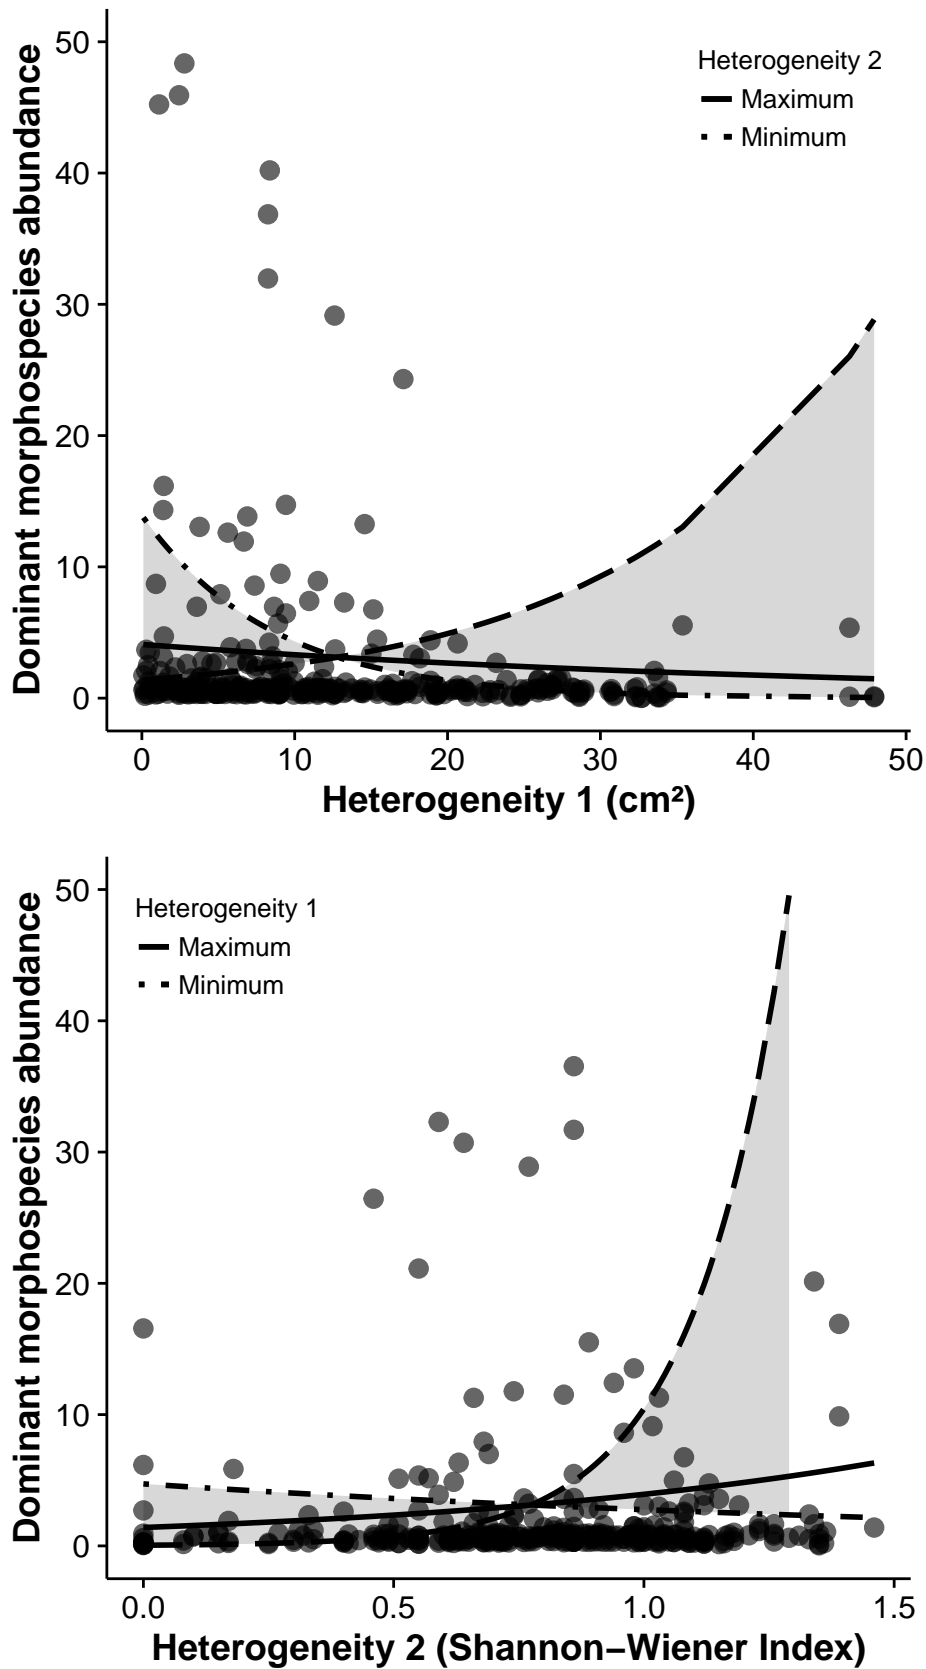

**Figure 3.** Poisson model fit to the abundance data of the dominant species in relation to Heterogeneity 1 and its interaction with Heterogeneity 2 (top) and vice-versa. Both graphs show the relationship between the heterogeneity measure in the 'x' axis and the abundance of the dominant species for the mean value of the other measure (solid line), maximum value observed (long-dash line), and minimum value observed (dash-dot line). The shaded area shows this variation in a continuum from minimum to maximum value.
